# Supplementary material for: Drug Response of Patient-Derived Lung Cancer Cells Predicts Clinical Outcomes of Targeted Therapy
Source: MDPI journal article supplement (doi:10.3390/cancers16040778), 2024-02-14
Supplement: s1 [file s1]

**Table S1. Screening drug list**

| No. | Name          | Target                                                   | Class                         | Screen |
|-----|---------------|----------------------------------------------------------|-------------------------------|--------|
| 1   | Adavosertib   | Wee1                                                     | Cell cycle                    | 226    |
| 2   | Afatinib      | EGFR                                                     | PTK (Protein Tyrosine Kinase) | 391    |
| 3   | AICAR         | AMPK                                                     | Others                        | 211    |
| 4   | Alectinib     | ALK                                                      | Others                        | 272    |
| 5   | Alisertib     | Aurora A                                                 | cell cycle                    | 75     |
| 6   | Alpelisib     | PI3K                                                     | PI3K/AKT/mTOR                 | 334    |
| 7   | AT7519        | CDK1, 2, 4, 6 and 9                                      | Cell cycle                    | 175    |
| 8   | auranofin     | 5-lipoxygenase                                           | Inflammation                  | 72     |
| 9   | AZD4547       | FGFR1/2/3                                                | Others                        | 211    |
| 10  | AZD7762       | Chk1                                                     | Cell cycle                    | 390    |
| 11  | Barasertib    | Aurora Kinase                                            | Cell cycle                    | 329    |
| 12  | Berzosertib   | ATR                                                      | Cell cycle                    | 229    |
| 13  | Bosutinib     | Src                                                      | Others                        | 73     |
| 14  | Brigatinib    | ALK, FLT3, IGF1R, EGFR(C797S/del19)                      | Angiogenesis                  | 73     |
| 15  | Cabozantinib  | VEGFR2, c-Met, Ret, Kit, Flt-1/3/4, Tie2 and AXL         | Angiogenesis                  | 269    |
| 16  | Camptothecin  | Topoisomerase                                            | DNA damage                    | 362    |
| 17  | Capivasertib  | AKT                                                      | PI3K/AKT/mTOR                 | 210    |
| 18  | CB-839        | glutaminase inhibitor                                    | metabolism                    | 75     |
| 19  | Ceritinib     | ALK                                                      | Others                        | 381    |
| 20  | CHIR-99021    | GSK-3                                                    | PI3K/Akt/mTOR                 | 75     |
| 21  | Cisplatin     | DNA synthesis                                            | DNA damage                    | 360    |
| 22  | Crizotinib    | c-Met, ALK                                               | Others                        | 386    |
| 23  | Dasatinib     | Src, Bcr-Abl, c-Kit                                      | Angiogenesis                  | 233    |
| 24  | Dinaciclib    | CDK1, 2, 5 and 9                                         | Cell cycle                    | 188    |
| 25  | Etoposide     | Topoisomerase                                            | DNA damage                    | 361    |
| 26  | Everolimus    | mTOR                                                     | PI3K/AKT/mTOR                 | 264    |
| 27  | Fluoxetine    | 5-HT receptor                                            | Neuronal Signaling            | 72     |
| 28  | Fostamatinib  | Syk                                                      | Others                        | 72     |
| 29  | Galunisertib  | TGFbR1 (ALK5)                                            | Others                        | 197    |
| 30  | Gefitinib     | EGFR                                                     | PTK (Protein Tyrosine Kinase) | 396    |
| 31  | Gemcitabine   | Deoxycytidine analogue                                   | DNA damage                    | 365    |
| 32  | Ibrutinib     | BTk                                                      | PTK (Protein Tyrosine Kinase) | 234    |
| 33  | Ivosidenib    | IDH1                                                     | Others                        | 211    |
| 34  | JQ1           | BRD                                                      | Others                        | 75     |
| 35  | Larotrectinib | TRK                                                      | Others                        | 234    |
| 36  | Lorlatinib    | ALK/ROS1                                                 | Others                        | 275    |
| 37  | Navitoclax    | Bcl-2                                                    | Others                        | 299    |
| 38  | Nilotinib     | Bcr-Abl                                                  | Others                        | 73     |
| 39  | NOV1402       | PARP/TNK                                                 | Others                        | 72     |
| 40  | Olaparib      | PARP                                                     | Others                        | 230    |
| 41  | Ompalisib     | PI3K                                                     | PI3K/Akt/mTOR                 | 73     |
| 42  | Osimertinib   | EGFR                                                     | PTK (Protein Tyrosine Kinase) | 229    |
| 43  | Paclitaxel    | Microtubule Associated                                   | DNA damage                    | 354    |
| 44  | Palbociclib   | CDK4/6                                                   | cell cycle                    | 229    |
| 45  | Pazopanib     | VEGFR1, VEGFR2, VEGFR3, PDGFR, FGFR, c-Kit and c-Fms     | PTK (Protein Tyrosine Kinase) | 264    |
| 46  | PD0166285     | Wee1, Chk1                                               | Cell cycle                    | 207    |
| 47  | Pemetrexed    | Thymidylate synthase, DHFR                               | DNA damage                    | 363    |
| 48  | PF-562271     | FAK                                                      | Others                        | 209    |
| 49  | Pozotinib     | Pan_HER, HER1/2/4                                        | PTK (Protein Tyrosine Kinase) | 211    |
| 50  | Pyrimethamine | DHFR, STAT3                                              | Others                        | 75     |
| 51  | Repotrectinib | ALK/ROS1/TRK/SRC                                         | Others                        | 233    |
| 52  | Rigosertib    | PLK1                                                     | cell cycle                    | 75     |
| 53  | Ruxolitinib   | JAK1/2                                                   | Others                        | 230    |
| 54  | Saracatinib   | Src, Bcr-Abl                                             | Angiogenesis                  | 309    |
| 55  | Selumetinib   | MEK                                                      | MAPK                          | 333    |
| 56  | Sitravatinib  | RTKs(RET, VEGFR, PDGFR, KIT), TRKs, DDR2, MET, AXL, cKit | PTK (Protein Tyrosine Kinase) | 194    |
| 57  | Tanespimycin  | HSP90                                                    | Others                        | 198    |
| 58  | THZ1          | CDK7                                                     | cell cycle                    | 75     |
| 59  | Torin 2       | mTOR                                                     | PI3K/Akt/mTOR                 | 75     |
| 60  | Trametinib    | MEK                                                      | MAPK                          | 234    |
| 61  | Vemurafenib   | Raf                                                      | MAPK                          | 234    |
| 62  | Vismodegib    | Hedgehog                                                 | Others                        | 197    |
| 63  | Vorinostat    | HDAC                                                     | Others                        | 197    |
| 64  | XAV-939       | Wnt/TNKS/beta-catenin                                    | Others                        | 225    |

**Table S2. The origin of patient-derived cells**

| Specimen |                        | No. of sampling | No. of successful drug screening test | Median time from sampling to report |
|----------|------------------------|-----------------|---------------------------------------|-------------------------------------|
| Fluid    | Pleural effusion       | 404             | 343 (84.9%)                           | 15.3 days                           |
|          | Pericardial effusion   | 16              | 15 (93.8%)                            | 10.8 days                           |
|          | Ascites                | 6               | 5 (83.3%)                             | 13.9 days                           |
|          | Cerebrospinal fluid    | 3               | 0 (0.0%)                              | -                                   |
|          | Urine                  | 1               | 1 (100.0%)                            | 16.0 days                           |
| Tissue   | Aspirates and biopsies | 27              | 11 (40.7%)                            | 22.0 days                           |
|          | Resected sample        | 30              | 21 (70.0%)                            | 19.2 days                           |
| Total    |                        | 487             | 397 (81.5%)                           | 15.5 days                           |

**Table S3. Clinical characteristics of treatment-naïve PDCs with *EGFR* mutation or *ALK* fusion**

| Characteristics |                      | Total<br>No. (%) |
|-----------------|----------------------|------------------|
| Total           |                      | 59               |
| Age             | < 65 years           | 31 (52.5)        |
|                 | ≥ 65 years           | 28 (47.5)        |
| Gender          | Male                 | 23 (39.0)        |
|                 | Female               | 36 (61.0)        |
| Histology       | Adenocarcinoma       | 56 (94.9)        |
|                 | Non-adenocarcinoma   | 3 (5.1)          |
| Sample          | Effusion             | 55 (93.2)        |
|                 | Tissue               | 4 (6.8)          |
| Oncogene        | <i>EGFR</i> mutation | 49 (83.1)        |
|                 | <i>ALK</i> fusion    | 10 (16.9)        |
| Drug            | EGFR-targeted drug   |                  |
|                 | Erlotinib            | 14 (28.6)        |
|                 | Gefitinib            | 6 (12.2)         |
|                 | Afatinib             | 2 (4.1)          |
|                 | Dacomitinib          | 1 (2.0)          |
|                 | Osimertinib          | 26 (53.1)        |
|                 | ALK-targeting drug   |                  |
|                 | Crizotinib           | 5 (50.0)         |
|                 | Alectinib            | 3 (30.0)         |
|                 | Ceritinib            | 1 (10.0)         |
|                 | Brigatinib           | 1 (10.0)         |

**Table S4. The classification of PDC drug sensitivity**

| <b>Relative PDC drug response</b>                     |                           | <b>Classification</b>    |
|-------------------------------------------------------|---------------------------|--------------------------|
| <b>The rank of AUC <math>\leq</math> 25%</b>          | <b>Highly sensitive</b>   | <b>PDC responder</b>     |
| <b>25% &lt; The rank of AUC <math>\leq</math> 50%</b> | <b>Moderate sensitive</b> |                          |
| <b>50% &lt; The rank of AUC <math>\leq</math> 75%</b> | <b>Moderate resistant</b> | <b>PDC non-responder</b> |
| <b>75% &gt; The rank of AUC</b>                       | <b>Highly relative</b>    |                          |

**Table S5. Multivariate analysis of overall survival for EGFR-or ALK-tyrosine kinase inhibitors**

| Characteristics |                    | No.       | Univariate analysis |                       | Multivariate analysis |                       |
|-----------------|--------------------|-----------|---------------------|-----------------------|-----------------------|-----------------------|
|                 |                    |           | HR (95% CI)         | <i>P</i> <sup>†</sup> | HR (95% CI)           | <i>P</i> <sup>†</sup> |
| Age             | ≥ 65 vs. <65 years | 28 vs. 31 | 1.12 (0.56-2.25)    | 0.747                 |                       |                       |
| Gender          | Male vs. Female    | 23 vs. 36 | 1.65 (0.79-3.44)    | 0.179                 |                       |                       |
| ECOG PS         | 0-1 vs. 2-3        | 41 vs. 18 | 0.27 (0.13-0.58)    | <0.001                | 0.32 (0.15-0.68)      | 0.003                 |
| Smoking         | Never vs. Ever     | 30 vs. 19 | 0.74 (0.36-1.51)    | 0.405                 |                       |                       |
| Histology       | ADC vs. non-ADC    | 56 vs. 3  | 0.65 (0.15-2.74)    | 0.558                 |                       |                       |
| Operation       | No vs. Yes         | 42 vs. 12 | 2.55 (1.05-6.21)    | 0.040                 | 2.00 (0.76-5.22)      | 0.160                 |
| BM metastasis   | No vs. Yes         | 41 vs. 18 | 0.39 (0.19-0.79)    | 0.009                 | 0.67 (0.30-1.50)      | 0.334                 |
| <i>TP53</i>     | WT vs. MT          | 14 vs. 11 | 0.76 (0.29-1.98)    | 0.571                 |                       |                       |
| PDC response    | Yes vs. No         | 40 vs. 19 | 0.50 (0.24-1.04)    | 0.065                 | 0.58 (0.27-1.26)      | 0.171                 |

Notes: <sup>†</sup>tested with Cox proportional hazards model. Abbreviations: HR, hazard ratio; CI, confidence interval; ECOG PS, ECOG performance status; ADC, adenocarcinoma; BM, brain metastasis; WT, wild type; MT, mutant type; TKI, tyrosine kinase inhibitor; PDC, patient-derived cell.

**Table S6. Clinical, pathologic, and genetic characteristics of patients with *EGFR*-or *ALK*- positive NSCLC who had did not respond to *EGFR* or *ALK*-TKIs**

|   | Patient No. | Histology | Companion diagnostics                   | Tissue/plasma targeted sequencing       | PDC targeted sequencing                                                                                                                                             | Targeted drug | Tumor response to targeted drug                            | Subsequent treatment                | Possible cause of no response            |
|---|-------------|-----------|-----------------------------------------|-----------------------------------------|---------------------------------------------------------------------------------------------------------------------------------------------------------------------|---------------|------------------------------------------------------------|-------------------------------------|------------------------------------------|
| 1 | NCCLu-034   | LUAD      | ALK-FISH: positive<br>ALK-IHC: 1+       | No variant                              | —                                                                                                                                                                   | Crizotinib    | PD                                                         | Alimta (PD)                         | False positivity                         |
| 2 | NCCLu-089   | LUAD      | ALK-IHC: 2+                             | EML4-ALK<br>TP53 R175H, JAK2 V617F      | TP53 R175H, HGF P8Q, DNMT3A R676W, PALB2 V1103M                                                                                                                     | Crizotinib    | Overall PD: primary tumor (PR), pleural effusion/bone (PD) | Alimta+cisplatin (PD)               | Tumor heterogeneity                      |
| 3 | NCCLu-131   | LUAD      | ALK-FISH: positive                      | BRAF V600E, TP53 W53*                   | BRAF V600E, P53 W53*, RBM10 splice site                                                                                                                             | Crizotinib    | PD                                                         | Dabrafenib+ Trametinib (SD)         | Tumor heterogeneity                      |
| 4 | NCCLu-237   | LLC       | ALK-IHC (D5F3): positive                | EML4-ALK                                | No variant                                                                                                                                                          | Alectinib     | PD                                                         | Alimta (PD)                         | Histology-neuroendocrine                 |
| 5 | NCCLu-099   | LUAD      | Real-time PCR<br>EGFR-Cobas: EGFR 19del | EGFR 19del, PTEN C105fs8, TP53 G245fs*2 | EGFR 19del, TP53G245fs, ARID1A T1345A, DNMT3A S638C, PTEN C105fs                                                                                                    | Gefitinib     | SD<br>PFS: 2.9 mo                                          | Osimertinib: PD, new lesion (liver) | Concurrent resistant mutation; PTEN loss |
| 6 | NCCLu-263   | LUAD      | Real-time PCR<br>EGFR-Cobas: EGFR 19del | EGFR 19del, PIK3CA M1004I               | EGFR 19del, PIK3CA M1004I, HGF E654Q, WHSC1L1 R780H, TET2 1421 insN, DNMT3A Y536del, SNCAIP Q118E, CSF1R G933S, PARP3 EAL234del, FLT1 S755Y, FLT1 E201D, MSH3 C822Y | Erlotinib     | SD<br>PFS; 3.1 mo                                          | Alimta+cisplatin (PD)               | Concurrent resistant mutation – PIK3CA   |
| 7 | NCCLu-320   | LUAD      | Real-time PCR<br>EGFR-Cobas: EGFR L858R | EGFR L858R, PIK3CA K111E                | —                                                                                                                                                                   | Osimertinib   | PD                                                         | Alimta+cisplatin (PD)               | Concurrent resistant mutation; PIK3CA    |

|    |           |      |                                                     |                                                                                                                          |                                                            |             |                   |                                                         |                                                     |
|----|-----------|------|-----------------------------------------------------|--------------------------------------------------------------------------------------------------------------------------|------------------------------------------------------------|-------------|-------------------|---------------------------------------------------------|-----------------------------------------------------|
| 8  | NCCLu-253 | LUSC | Real-time PCR<br>EGFR-Cobas:<br>EGFR 19del          | —                                                                                                                        | —                                                          | Erlotinib   | PD                | Radiotherapy                                            | Histology<br>-squamous<br>cell<br>carcinoma         |
| 9  | NCCLu-446 | LUAD | Real-time PCR<br>EGFR-Cobas:<br>EGFR L858R          | EGFR L858R,<br>ACVR1B splice site<br>91+1G>T, CBL C384Y,<br>CBL C404Y, DNMT3A<br>splice site<br>1851+1G>A, TP53<br>E171G | EGFR L858R, TP53<br>E171G, BRCA2 K1533N,<br>SMARCA4 K1349* | Afatinib    | PD                | Atezolizumab+<br>bevacizumab+<br>taxol+carboplatin (PR) | Concurrent<br>resistant<br>mutation-<br>ACVR1B loss |
| 10 | NCCLu-489 | LUAD | Real-time PCR<br>EGFR-Cobas:<br>EGFR<br>19del/T790M | —                                                                                                                        | —                                                          | Osimertinib | SD<br>PFS; 3.5 mo | none                                                    | Unknown                                             |

Abbreviation: LUAD, lung adenocarcinoma; LUSC, lung squamous cell carcinoma; LCC, large cell carcinoma

**Table S7. Clinical, pathologic, and genetic characteristics of patients who unexpectedly had response to *EGFR*-TKIs**

|   | Patient No. | Histology | Companion diagnostics                                  | Tissue/plasma targeted sequencing                                | PDC targeted sequencing       | Previous <i>EGFR</i> -TKI | Targeted drug | Tumor response to targeted drug           | Categories                                                   |
|---|-------------|-----------|--------------------------------------------------------|------------------------------------------------------------------|-------------------------------|---------------------------|---------------|-------------------------------------------|--------------------------------------------------------------|
| 1 | NCCLU-027   | ADC       | Real-time PCR<br>EGFR-Cobas:<br>EGFR wild type         | PIK3CA E81K                                                      | ERBB3 E1098Q                  | none                      | Erlotinib     | PR<br>(PFS 22 mo)                         | Low-frequency mutation                                       |
| 2 | NCCLU-157   | ADC       | Real-time PCR<br>EGFR-Cobas:<br>EGFR exon 20 insertion | EGFR<br>A763_Y764insF<br>QEA, TP53<br>T155N                      | EGFR<br>A763_Y764insFQEA      | none                      | Erlotinib     | PR<br>(PFS 8 mo)                          | Uncommon <i>EGFR</i> mutation                                |
| 3 | NCCLU-045   | ADC       | Real-time PCR<br>EGFR-Cobas:<br>EGFR L858R             | EGFR<br>L858R                                                    | EGFR L858R,<br>EGFR I744M     | Erlotinib,<br>Osimertinib | Erlotinib     | PR<br>(PFS 11 mo)                         | Rechallenge with <i>EGFR</i> -TKI (TKI-free interval; 23 Mo) |
| 4 | NCCLU-254   | ADC       | Real-time PCR<br>EGFR-Cobas:<br>EGFR 19del             | EGFR 19del,<br>MET amp,<br>CDKNA2 loss,<br>NFE2L2, TP53<br>E271Q | EGFR 19del, ARID1A,<br>NFE2L2 | Erlotinib                 | Erlotinib     | PR<br>(PFS 2 mo, stop due to pneumonitis) | Rechallenge with <i>EGFR</i> -TKI (TKI-free interval; 7 Mo)  |
| 5 | NCCLU-256   | ADC       | Real-time PCR<br>EGFR-Cobas:<br>EGFR 19del             | —                                                                | —                             | Erlotinib                 | Osimertinib   | PR<br>(PFS 29 mo)                         | Rechallenge with <i>EGFR</i> -TKI (TKI-free interval; 10 Mo) |
| 6 | NCCLU-406   | ADC       | Real-time PCR<br>EGFR-Cobas:<br>EGFR L858R             | EGFR L858R,<br>PIK3CA E726K,<br>GNAS R258L,<br>BRCA1 E686*       | —                             | Erlotinib                 | Osimertinib   | PR<br>(PFS 6 mo)                          | Rechallenge with <i>EGFR</i> -TKI (TKI-free interval; 9 Mo)  |
| 7 | NCCLU-470   | ADC       | Real-time PCR<br>EGFR-Cobas:<br>EGFR L858R             | EGFR L858R,                                                      | EGFR L858R, BRIP1,<br>CDKN1A  | Erlotinib                 | Erlotinib     | PR<br>(PFS 4 mo)                          | Rechallenge with <i>EGFR</i> -TKI (TKI-free interval; 11 Mo) |

Abbreviation: ADC, adenocarcinoma
